# Supplementary material
Source: PubMed Central journal article supplement (PMC4294267)
Supplement: IAI.02349-14_zii999091056so1.pdf [file IAI.02349-14_zii999091056so1.pdf]

Supplementary figure 1.

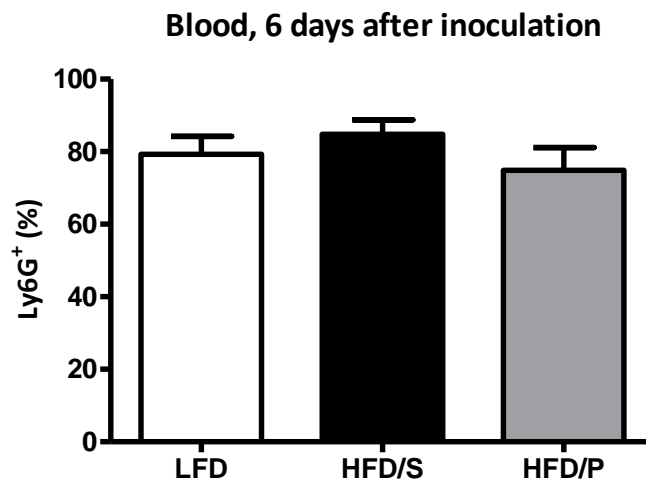

**Supplementary figure 1. There was no difference in frequency of neutrophils in blood, 6 days after i.v. inoculation.** The frequency of neutrophils in blood was measured after 8 weeks on different diets and 6 days after i.v. inoculation. Data was analyzed using one-way ANOVA. Data are shown as means  $\pm$  SEM.  $n=9$  mice per group. Experimental groups: Low fat diet (LFD), saturated high fat diet (HFD/S), and polyunsaturated high fat diet (HFD/P).
