# Supplementary material
Source: PubMed Central journal article supplement (PMC4294267)
Supplement: IAI.02349-14_zii999091056so2.pdf [file IAI.02349-14_zii999091056so2.pdf]

Supplementary figure 2.

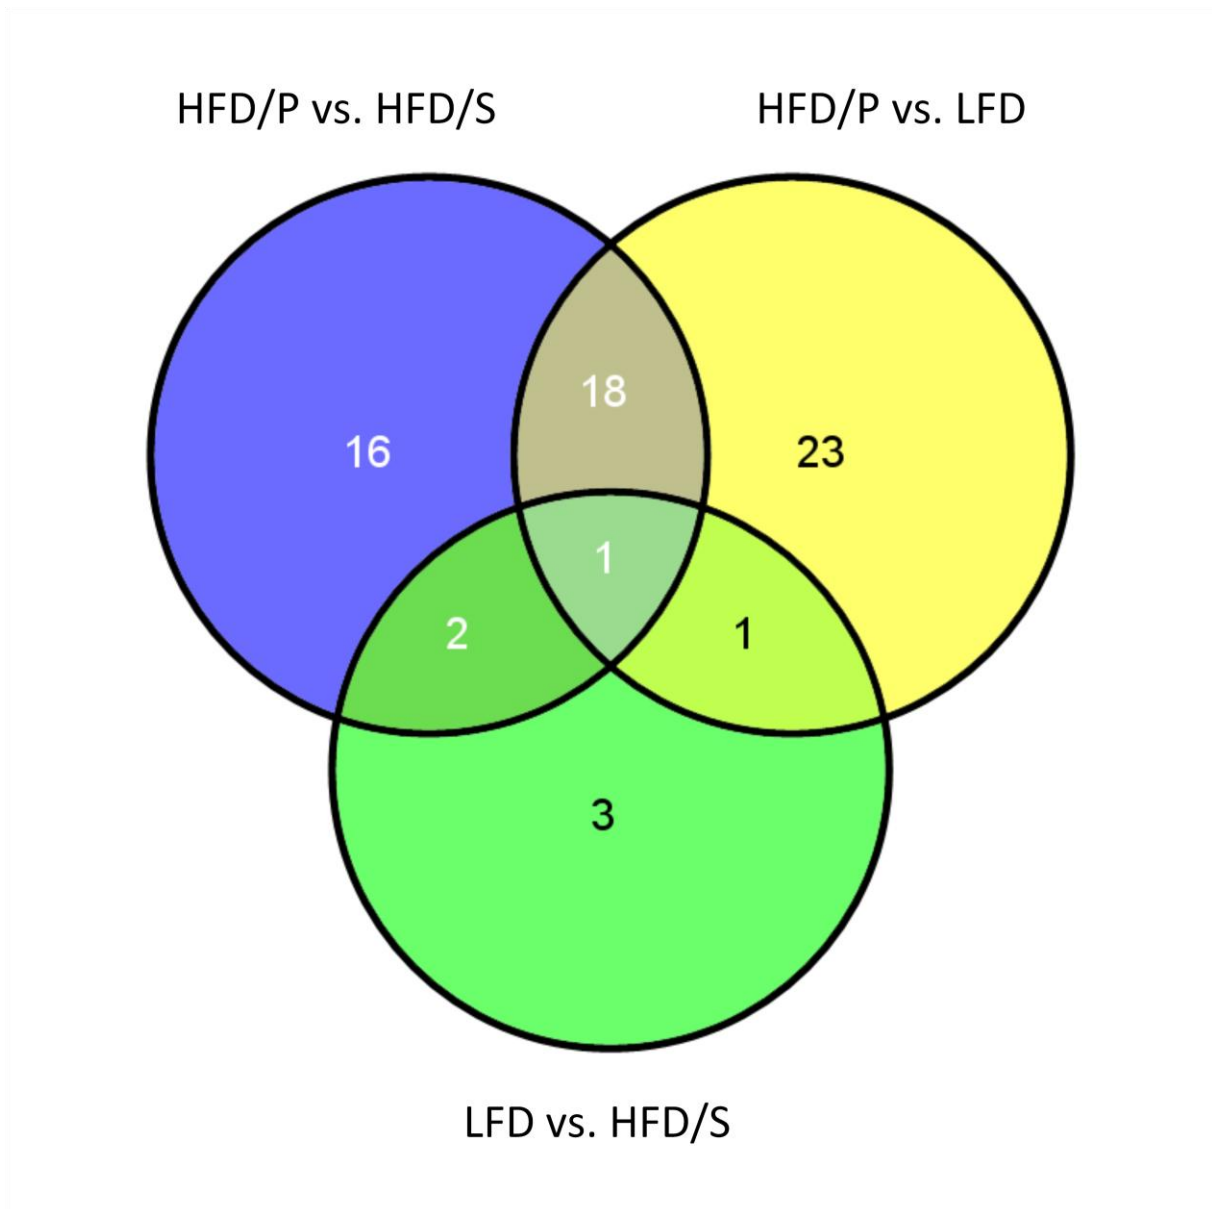

**Supplementary figure 2. Venn diagram showing gene expression in the different diets.**

The expression of 18 genes in bone marrow that were regulated in HFD/P fed mice when compared with mice fed the other diets, HFD/S and LFD, after 8 week on diet. Experimental groups: Low fat diet (LFD), saturated high fat diet (HFD/S) and polyunsaturated high fat diet (HFD/P).
